# Supplementary material for: μCB-seq: microfluidic cell barcoding and sequencing for high-resolution imaging and sequencing of single cells
Source: Royal Society of Chemistry journal article supplement (doi:10.1039/d0lc00169d), 2020-01-01
Supplement: d0lc00169d1.xlsx [file d0lc00169d1.xlsx]

## Sheet: Upfront Equipment Cost
HARDWARE AND EQUIPMENT COST
μCB-seq: 96 cell setup
Component	Quantity	Cost Per Unit	Total Cost	Catalog Number	Link
Pneumatic Control System Setup	1	5024.48	5024.48	NA	https://www.sciencedirect.com/science/article/pii/S2468067217300433
Pneumadyne 24V Solenoid Valve	30	25.18	755.4	S10MM-31-24-2	https://www.pneumadyne.com/flying-leads-p-1419.html#1-YToxOntzOjQ6ImdyaWQiO2k6MDt9
Pneumadyne Solenoid Valve Manifold	4	28.09	112.36	MSV10-10	https://www.pneumadyne.com/single-station-solenoid-bases-p-1459.html#1-YToxOntzOjQ6ImdyaWQiO2k6MDt9
KATARA Controller	1	200	200	NA	https://www.sciencedirect.com/science/article/pii/S246806721730041X
Fisher Scientific Thermal Mixer	1	2268.3	2268.3	15600330	https://www.fishersci.com/shop/products/fisher-scientific-heat-cool-thermal-mixer-ii-heat-cool-themal-mixer-ii/15600330
		Total Cost	8360.54
Fluidigm C1
Component	Quantity	Cost Per Unit	Total Cost	Catalog Number	Link
C1 system	1	120000	120000	100-7000	https://www.fluidigm.com/products/c1-system
		Total Cost	$120,000.00
LIBRARY PREPARTATION COST-PER-CELL
Reagent and device cost
μCB-seq: 96 cell setup
Reagent	Catalog #	Order Quantity	Cost Per Unit	Per-Run Quantity	Number of 96-cell Chips	Price / 96-Cell Chip
Barcode oligo-dT	IDT Custom Plate Oligo	100 nmole * 96	1328	28.8 pmole * 96	333333	0.003984
Phusion HF Buffer	NEB, B0518S	6 mL	24	10 nL	600000	4e-05
Triton	Sigma, T8787-50ML	50 mL	28.5	8 nL	6250000	4.56e-06
Pluronic	Sigma, P2443-250G	250 g	53.8	20 ug	12500000	4.304e-06
Tween 20	Sigma, P1379-250ML	250 mL	34.8	10 nL	25000000	1.392e-06
RNase Inhibitor	Takara, 2313B	25000 U	513	8 U	3125	0.16416
E5V6 TSO	IDT Custom Oligo	100 nmole	37.5	40 pmole	2500	0.015
PEG 8000	Sigma, 89510	250 g	43.2	1.5 mg	166667	0.000259199
dNTPs	Thermo Fisher, R0182	100 umole	562	20 nmole	5000	0.1124
Maxima H- RT	Thermo Fisher, EP0753	40000 U	680	40 U	1000	0.68
ExoI	Thermo Fisher, EN0582	20000 U	362	20 U	1000	0.362
Terra PCR Direct Mix	Takara, 639271	800 rxns	529	1.5 rxns	533	0.992495
SINGV6 Primer	IDT Custom Oligo	25 nmole	50.14	15 pmole	1667	0.030078
Ampure Beads	Beckman Coulter, A63882	450 mL	6200	95 uL	4737	1.30885
Qubit	Thermo Fisher, Q32854	500 rxns	308	1 rxn	500	0.616
Nextera XT	FC-131-1096	96 rxns	2862.8	1 rxn	96	29.8208
PNEXTP5 Primer	IDT Custom Oligo	25 nmole	60.4	2.5 pmole	10000	0.00604
PDMS	Momentive RTV615 CLEAR 010	3785 grams	659.65	80 grams	47	14.0351
					Total Cost per 96-cell chip	48.1473
					μCB-seq Total Library Prep Cost/Cell	0.501534
Fluidigm C1: 96 cell IFC
Reagent	Catalog #	Order Quantity	Cost Per Unit	Per-Run Quantity	Number of 96-cell Chips	Price / 96-Cell Chip
C1 Single-Cell Reagent Kit for mRNA Seq	Fluidigm, 100-6201	10 IFCs	629	1 IFC	10	62.9
C1 IFC for mRNA seq	Fluidigm 100-5759; 100-5760; 100-5761	10 IFCs	7300	1 IFC	10	730
SMART-Seq® v4 Ultra® Low Input RNA Kit for the Fluidigm® C1™ System, 10 IFCs	Takara, 635026	10 IFCs	2688	1 IFC	10	268.8
Illumina Nextera XT DNA Sample Preparation Kit	Illumina, FC-131-1096	96 rxns	2862.8	24 rxns	4	715.7
Illumina Nextera XT DNA Library Preparation Index Kits	Illumina, TG-131-2001	80 uL x 12 (i7)	1208	120 uL	8	151
Agencourt® AMPure® XP	Beckman Coulter, A63882	450 mL	6200	174 uL	2586.2	2.39734
Qubit	Thermo Fisher, Q32854	500 rxns	308	96 rxns	5.21	59.1171
					Total Cost per 96-cell chip	1990
					C1 Total Library Prep Cost/Cell	20.73
