# Supplementary material for: μCB-seq: microfluidic cell barcoding and sequencing for high-resolution imaging and sequencing of single cells
Source: Royal Society of Chemistry journal article supplement (doi:10.1039/d0lc00169d), 2020-01-01
Supplement: d0lc00169d3.xlsx [file d0lc00169d3.xlsx]

## Sheet: 10 pg HEK Total RNA | Figure 3
Supplemental Data Table 1: Sequencing summary statistics for all 10 pg HEK total RNA samples processed on two 𝜇CB-seq devices and analyzed as presented in Figure 3 of this manuscript.
Sr. No.	Barcode	Chip #	Sequencing Chemistry	Sequencing Batch	Sequencing Platform	Sequencing Depth
1	ACTGCGT	1	𝜇CB-seq	1	MiniSeq	76710
2	ATCGTGC	1				111727
3	ATGCGTC	1				41827
4	CTCGACA	1				60085
5	CTGCTGA	1				38561
6	GCGTATC	1				84913
7	GCTGTAC	1				93049
8	GTCGCAT	1				81865
9	GTGCACT	1				44354
10	TCCAGCA	1				68052
11	ACTGCGT	2				64073
12	ATCGTGC	2				64705
13	ATGCGTC	2				50154
14	CTCGACA	2				45715
15	CTGCTGA	2				60891
16	GCGTATC	2				51237
17	GCTGTAC	2				66989
18	GTCGCAT	2				92830
19	GTGCACT	2				69444
20	TCCAGCA	2				91583
					Total Reads	1358764
					Average Read Depth	67938.2

## Sheet: Single HEK Cell | Figure 4
Supplemental Data Table 2: Sequencing summary statistics for all single HEK cells processed on two 𝜇CB-seq devices and analyzed as presented in Figure 4 of this manuscript.
Sr. No.	Barcode	Chip #	Sequencing Chemistry	Sequencing Batch	Sequencing Platform	Sequencing Depth
1	ACATGCGT	1	𝜇CB-seq	2	MiniSeq	498991
2	ATACGTGC	1				747079
3	ATAGCGTC	1				269734
4	CTAGCTGA	1				307760
5	GCAGTATC	1				388638
6	GCATGTAC	1				1075768
7	GTACGCAT	1				223584
8	GTAGCACT	1				446942
9	TCACAGCA	1				339732
10	ACATGCGT	2				445705
11	ATACGTGC	2				843948
12	ATAGCGTC	2				227311
13	CTACGACA	2				378319
14	CTAGCTGA	2				244798
15	GCATGTAC	2				668187
16	GTACGCAT	2				570252
17	GTAGCACT	2				620452
18	TCACAGCA	2				611244
					Total Reads	8908444
					Average Read Depth	494914

## Sheet: Single HEK Cell and Preadipocyt
Supplemental Data Table 3: Sequencing summary statistics for all single HEK cells and Preadipocytes processed on three 𝜇CB-seq devices and analyzed as presented in Figure 5 of this manuscript.
Sr. No.	Barcode	Chip #	Sequencing Chemistry	Sequencing Batch	Sequencing Platform	Sequencing Depth
1	ATGCACGT	1	𝜇CB-seq	3	MiniSeq	254436
2	CATCGTGA	1				172172
3	GGCATTGT	1				166915
4	GTAGCACT	1				305948
5	TATGCACG	1				254321
6	TCACAGCA	1				371975
7	TGCTACAG	1				687106
8	CATCGTGA	2				129908
9	CGCTATGA	2				553155
10	GGCATTGT	2				330301
11	GTAGCACT	2				318773
12	TATGCACG	2				631094
13	TCACAGCA	2				398464
14	ATAGCGTC	3				319417
15	CATCGTGA	3				595996
16	CGCTATGA	3				173339
17	GGCATTGT	3				426989
18	GTAGCACT	3				245332
19	TCACAGCA	3				346914
20	TGCTACAG	3				242650
					Total Reads	6925205
					Average Read Depth	346260

## Sheet: uCB-seq Cost Analysis
Supplemental Data Table 4: Line-by-line library preparation cost analysis for μCB-seq, including the cost of equipment, consumables, and reagents for a 96-cell throughput. Note: We performed a similar line-by-line cost analyis for the commercially available Fluidigm C1 integrated microfluidic platform and estimate the total library prepration cost to be ~$20 per cell (excluding upfront equipment …
Upfront Equipment Cost
Component	Quantity	Cost Per Unit	Total Cost	Catalog Number	Link	Comments
Pneumatic Control System Setup	1	5024.48	5024.48	NA	https://www.sciencedirect.com/science/article/pii/S2468067217300433
Pneumadyne 24V Solenoid Valve	30	25.18	755.4	S10MM-31-24-2	https://www.pneumadyne.com/flying-leads-p-1419.html#1-YToxOntzOjQ6ImdyaWQiO2k6MDt9	We assumed implementation of a binary multiplexing strategy for scaling up the number of solenoid valves needed for independent manipulation of individual cells. [J. Melin and S. R. Quake, Annu. Rev. Biophys. Biomol. Struct., 2007, 36, 213–231.]
Pneumadyne Solenoid Valve Manifold	4	28.09	112.36	MSV10-10	https://www.pneumadyne.com/single-station-solenoid-bases-p-1459.html#1-YToxOntzOjQ6ImdyaWQiO2k6MDt9
KATARA Controller	1	200	200	NA	https://www.sciencedirect.com/science/article/pii/S246806721730041X
Fisher Scientific Thermal Mixer	1	2268.3	2268.3	15600330	https://www.fishersci.com/shop/products/fisher-scientific-heat-cool-thermal-mixer-ii-heat-cool-themal-mixer-ii/15600330
		Total Cost	8360.54
Consumables and Reagent Cost
Reagent	Catalog #	Order Quantity	Cost Per Unit	Per-Run Quantity	Number of 96-cell Chips	Price / 96-Cell Chip
Barcode oligo-dT	IDT Custom Plate Oligo	100 nmole * 96	1328	28.8 pmole * 96	333333	0.003984
Phusion HF Buffer	NEB, B0518S	6 mL	24	10 nL	600000	4e-05
Triton	Sigma, T8787-50ML	50 mL	28.5	8 nL	6250000	4.56e-06
Pluronic	Sigma, P2443-250G	250 g	53.8	20 ug	12500000	4.304e-06
Tween 20	Sigma, P1379-250ML	250 mL	34.8	10 nL	25000000	1.392e-06
RNase Inhibitor	Takara, 2313B	25000 U	513	8 U	3125	0.16416
E5V6 TSO	IDT Custom Oligo	100 nmole	37.5	40 pmole	2500	0.015
PEG 8000	Sigma, 89510	250 g	43.2	1.5 mg	166667	0.000259199
dNTPs	Thermo Fisher, R0182	100 umole	562	20 nmole	5000	0.1124
Maxima H- RT	Thermo Fisher, EP0753	40000 U	680	40 U	1000	0.68
ExoI	Thermo Fisher, EN0582	20000 U	362	20 U	1000	0.362
Terra PCR Direct Mix	Takara, 639271	800 rxns	529	1.5 rxns	533	0.992495
SINGV6 Primer	IDT Custom Oligo	25 nmole	50.14	15 pmole	1667	0.030078
Ampure Beads	Beckman Coulter, A63882	450 mL	6200	95 uL	4737	1.30885
Qubit	Thermo Fisher, Q32854	500 rxns	308	1 rxn	500	0.616
Nextera XT	FC-131-1096	96 rxns	2862.8	1 rxn	96	29.8208
PNEXTP5 Primer	IDT Custom Oligo	25 nmole	60.4	2.5 pmole	10000	0.00604
PDMS	Momentive RTV615 CLEAR 010	3785 grams	659.65	80 grams	47	14.0351
Coverglass	Tedpella 260462-100	100 units	174	1 unit	100	1.74
					Total Cost per 96-cell chip	49.8873
					Total Library Prep Cost/Cell	0.519659
